# Supplementary material
Source: publisher figshare collection journal article supplement (https://acs.figshare.com/ndownloader/files/16624076)
Supplement: Supplementary file 1 [file 16624076]

# Supporting Information: Colorimetric and Near-Absolute Polarization Insensitive Refractive-Index Sensing in All-Dielectric Guided-Mode Resonance based Metasurface

Deniz Umut Yildirim,<sup>\*,†,‡</sup> Amir Ghobadi,<sup>†,‡</sup> Mahmut Can Soydan,<sup>†,‡</sup> Murat  
Gokbayrak,<sup>†</sup> Ahmet Toprak,<sup>†</sup> Bayram Butun,<sup>†</sup> and Ekmel Ozbay<sup>\*,†,‡,¶,§</sup>

<sup>†</sup>*NANOTAM-Nanotechnology Research Center, Bilkent University, 06800, Ankara, Turkey.*

<sup>‡</sup>*Department of Electrical and Electronics Engineering, Bilkent University, 06800, Ankara,  
Turkey.*

<sup>¶</sup>*Department of Physics, Bilkent University, 06800, Ankara, Turkey.*

<sup>§</sup>*UNAM-Institute of Materials Science and Nanotechnology, Bilkent University, Ankara,  
Turkey.*

E-mail: yildirim@ee.bilkent.edu.tr; ozbay@bilkent.edu.tr

Contents: 5 Pages

## Table of Contents

|                                                                                          |    |
|------------------------------------------------------------------------------------------|----|
| Theoretical Analysis of excitation of guided-mode resonances in the proposed 2D- grating | S2 |
|------------------------------------------------------------------------------------------|----|

# Theoretical Analysis of excitation of guided-mode resonances in the proposed 2D- grating

To shed some light on the physics behind this behavior, when the device is off-resonant, none of the diffracted wave orders from the grating can satisfy the conditions to become a guided-mode of the waveguide. So, the device essentially behaves as a multilayer film that mostly transmits the incoming wave, and some part is reflected due to Fresnel reflection. At resonance, however, a diffracted order can excite a guided-mode of the waveguide core. As the guided-mode propagates, the periodicity in the waveguide core causes it to continually radiate and leak energy to far-field. Accordingly, the phenomenon can be named as terms leaky-mode or quasi-guided mode resonance, as well.<sup>1</sup> The sharp increase in the reflection is due to the fact that the re-radiated waves interfere destructively with the directly transmitted waves, but constructively with the reflected waves. A more rigorous analysis is given in the Supporting Information.

To make the analysis more rigorous, the phase difference,  $\Phi$  between directly transmitted waves, and secondary transmitted waves that after the guided-mode is re-diffracted is given by Eq.S1.<sup>2</sup> On the other hand, a waveguide mode is supported if it satisfies the self-consistency constraint, given in Eq.S2.<sup>3?</sup> Comparing these two equations shows that if Eq.S2 (properly exciting a guided-mode) is satisfied, then  $\Phi$  needs to be an odd integer multiple of  $\pi$  by Eq.S1, so the transmitted waves to interfere destructively, and transmission is suppressed.

$$\Phi = 2ht_{Si_3N_4} + \Phi_{w,sub} + \Phi_{w,super} - \pi \quad (S1)$$

$$m2\pi = 2ht_{Si_3N_4} + \Phi_{w,sub} + \Phi_{w,super} \quad (S2)$$

where  $h = k_0 \sqrt{n_w^2 - n_{eff}^2}$  is the transverse component of the wavevector in the waveguide-grating,  $k_0 = 2\pi/\lambda_0$  is free-space wavenumber,  $\lambda_0$  is the free-space wavelength,  $n_w$  is the

refractive index of the GWS,  $n_{eff}$  is the effective refractive index of the guided-mode in the core, and  $m$  is the order of the mode. The first term in both equations is due to the phase accumulated as guided-mode travels propagates inside the waveguide. The  $\pi$  term in Eq.S1 is because, each diffraction causes  $\pi/2$  phase difference.<sup>4</sup>  $\Phi_{w,sub}$  and  $\Phi_{w,super}$  come from the total-internal reflection at the waveguide-substrate, and waveguide-superstrate boundaries, and the expressions for these are given in Eqns.S3 and S4, respectively.<sup>2,5?</sup>

$$\Phi_{w,sub} = -2 \tan^{-1} \left[ \left( \frac{n_w}{n_{sub}} \right)^{2\rho} * \frac{p}{h} \right] \quad (S3)$$

$$\Phi_{w,super} = -2 \tan^{-1} \left[ \left( \frac{n_w}{n_{super}} \right)^{2\rho} * \frac{q}{h} \right] \quad (S4)$$

where  $p = k_0 \sqrt{n_{eff}^2 - n_{sub}^2}$   $q = k_0 \sqrt{n_{eff}^2 - n_{super}^2}$  and are the exponential decay constants in substrate ( $\text{SiO}_2$ ) and superstrate regions, respectively.  $\rho$  is 0 for TE, 1 for TM modes;  $n_{super}$  and  $n_{sub} = n_{\text{SiO}_2}$  are the refractive indices of the superstrate and substrate.

The effective index of refraction associated with the guided-mode inside the waveguide is not only controlled by Eq.S2, but also with the phase-matching condition. In other words, the real part of the complex wavevector component of the guided-mode in the direction of its propagation is equal to the components coming from the reciprocal lattice vector of grating and the incident wave.<sup>2,6-10</sup> Eq.S3 provides the phase-matching condition for the devices with 2D grating,<sup>11</sup> such as Device I in the main text, under normally incident light.

$$\begin{aligned} k_{x,g} &= mK_x = n \frac{2\pi}{\Lambda_x} = n \frac{2\pi}{P\sqrt{3}} \\ k_{y,g} &= mK_y = l \frac{2\pi}{\Lambda_y} = l \frac{2\pi}{P} \\ \beta &= |k_{x,g}\hat{\mathbf{x}} + k_{y,g}\hat{\mathbf{y}}| \\ n_{eff} &= \frac{\beta\lambda_0}{2\pi} \end{aligned} \quad (S5)$$

where  $\beta$  is the propagation wavenumber along the guiding direction,  $\Lambda_x$  ( $K_x$ ) and  $\Lambda_y$  ( $K_y$ ) is the grating periods (reciprocal lattice vectors) along x and y-directions, respectively.  $n$  ( $l$ )

is the diffraction orders along x (y)-direction, and  $k_{x,g}$  ( $k_{y,g}$ ) is the wavevector component of the guided-mode along x (y)-direction.

Plugging-in Eqns. S3 and S4 inside Eq. S2 results in the well-known transcendental mode equations for TE and TM modes, given by Eqns. S6 and S7, respectively.

$$\tan(ht_{Si_3N_4}) = \frac{p + q}{h(1 - \frac{pq}{h^2})} \quad (S6)$$

$$\tan(ht_{Si_3N_4}) = \frac{\bar{p} + \bar{q}}{h(1 - \frac{\bar{p}\bar{q}}{h^2})} \quad (S7)$$

where  $\bar{p}$  and  $\bar{q}$  are defined as  $p * n_w^2 / n_{sub}^2$ ,  $q * n_w^2 / n_{super}^2$ , respectively.

## References

- (1) Ding, Y.; Magnusson, R. Resonant leaky-mode spectral-band engineering and device applications. *Optics Express* **2004**, *12*, 5661.
- (2) Rosenblatt, D.; Sharon, A.; Friesem, A. A. Resonant grating waveguide structures. *IEEE Journal of Quantum Electronics* **1997**, *33*, 2038–2059.
- (3) Taylor, J. *Journal of Modern Optics*; Elsevier, 2007; Vol. 39; pp 901–901.
- (4) Jackson, J. D.; Fox, R. F. *American Journal of Physics*; 1999; Vol. 67; pp 841–842.
- (5) Sahoo, P. K.; Sarkar, S.; Joseph, J. High sensitivity guided-mode-resonance optical sensor employing phase detection. *Scientific Reports* **2017**, *7*.
- (6) Magnusson, R.; Wang, S. S. New principle for optical filters. *Applied Physics Letters* **1992**, *61*, 1022–1024.
- (7) Wang, S. S.; Moharam, M. G.; Magnusson, R.; Bagby, J. S. Guided-mode resonances in planar dielectric-layer diffraction gratings. *Journal of the Optical Society of America A* **1990**, *7*, 1470.

- (8) Moharam, M. G.; Gaylord, T. K. Rigorous coupled-wave analysis of planar-grating diffraction. *Journal of the Optical Society of America* **1981**, *71*, 811.
- (9) Tamir, T. Leaky waves in planar optical waveguides. *Nouvelle Revue d'Optique* **1975**, *6*, 273–284.
- (10) Halir, R.; Bock, P. J.; Cheben, P.; Ortega-Moñux, A.; Alonso-Ramos, C.; Schmid, J. H.; Lapointe, J.; Xu, D. X.; Wangüemert-Pérez, J. G.; Molina-Fernández, Í.; Janz, S. Waveguide sub-wavelength structures: A review of principles and applications. *Laser and Photonics Reviews* **2015**, *9*, 25–49.
- (11) Peng, S.; Morris, G. M. Experimental demonstration of resonant anomalies in diffraction from two-dimensional gratings. *Optics Letters* **1996**, *21*, 549.
